# Supplementary material for: Excessive postnatal smooth muscle differentiation in a lung-specific model of TBX4-related pulmonary hypertension
Source: JCI journal article supplement (doi:10.1172/jci.insight.194251), 2026-04-23
Supplement: sd5 [file 5]

**Supplementary Table 1:** Comparison of Lung Phenotypes in *Tbx4cKO* Mice and Human TBX4 Syndrome

| <b>Feature</b>                        | <b>Mouse Model (<i>Tbx4cKO</i>)</b>                    | <b>Human TBX4 Syndrome</b>                     |
|---------------------------------------|--------------------------------------------------------|------------------------------------------------|
| <b>Hemodynamics</b>                   |                                                        |                                                |
| Pulmonary Hypertension                | Present                                                | Present                                        |
| PH Age of Onset                       | Adult                                                  | Variable (neonatal to geriatric)               |
| <b>Vasculature</b>                    |                                                        |                                                |
| Medial Thickening                     | Present                                                | Present                                        |
| Neointimal Lesions                    | Variable                                               | Variable                                       |
| Distal Muscularization                | Present                                                | Present                                        |
| Muscularized vessels near pleura      | Present                                                | Present                                        |
| PA Branching Pattern                  | Elaborated                                             | Not reported                                   |
| <b>Development</b>                    |                                                        |                                                |
| Lobe Volume                           | Reduced at E18.5                                       | Hypoplastic                                    |
| Distal Lung Development               | Underdeveloped distal airspaces reported <sup>38</sup> | Maldeveloped acini or abnormal alveolar growth |
| <b>Airways</b>                        |                                                        |                                                |
| Distal Muscularization                | Present                                                | Present                                        |
| SMC Ring Spacing                      | Widened                                                | Not specifically characterized                 |
| <b>Abnormal Mesenchymal Features</b>  |                                                        |                                                |
| Ectopic Interstitial "Myofibroblasts" | Present                                                | Present                                        |
| Subpleural SMC Bands                  | Present                                                | Present                                        |
| Heterologous Bone Formation           | Not seen                                               | Variable                                       |
